# Supplementary material for: Glutamate 73 Promotes Anti-arrhythmic Effects of Voltage-Dependent Anion Channel Through Regulation of Mitochondrial Ca2+ Uptake
Source: Front Physiol. 2021 Aug 18;12:724828. doi: 10.3389/fphys.2021.724828 (PMC8416314; doi:10.3389/fphys.2021.724828)
Supplement: Supplementary file 2 [file Table_1.XLSX]

## Sheet: Sheet1
Supplementary File 1.
Species origins and NCBI accession IDs for protein sequences used in phylogenetic analyses.
NCBI database: https://www.ncbi.nlm.nih.gov
Name	Accession
Homo_sapiens_VDAC1	NP_003365.1
Mus_musculus_VDAC1	NP_035824.1
Rattus_norvegicus_VDAC1	NP_112643.1
Xenopus_laevis_Vdac1	NP_001080684.1
Danio_rerio_Vdac1	NP_001001404.1
Takifugu_rubripes_Vdac1	XP_003971024.1
Oryzias_latipes_Vdac1	XP_004076112.1
Gallus_gallus_VDAC1	NP_001029041.1
Homo_sapiens_VDAC2	NP_001171712.1
Mus_musculus_VDAC2	NP_035825.1
Rattus_norvegicus_VDAC2	NP_112644.1
Gallus_gallus_VDAC2	NP_990072.1
Xenopus_laevis_Vdac2	NP_001089399.1
Danio_rerio_Vdac2	NP_955879.1
Takifugu_rubripes_Vdac2	XP_003964046.1
Oryzias_latipes_Vdac2	XP_004077149.1
Homo_sapiens_VDAC3	NP_001129166.1
Mus_musculus_VDAC3	NP_001185927.1
Rattus_norvegicus_VDAC3	AAH61780.1
Gallus_gallus_VDAC3	XP_015157909.1
Xenopus_laevis_Vdac3	NP_001085356.1
Danio_rerio_Vdac3	XP_005166801.1
Oryzias_latipes_Vdac3	XP_011477191.1
Takifugu_rubripes_Vdac3	XP_003974974.1
Petromyzon_marinus_1	UniProt:S4RF01
Petromyzon_marinus_2	UniProt:S4RJJ6
Branchiostoma_belcheri	XP_019620170.1
Ciona_intestinalis	XP_026695817.1
Strongylocentrotus_purpuratus	XP_780266.1
Aedes_aegypti	XP_021700806.1
Crassostrea_gigas	NP_001292225.1
Caenorhabditis_elegans	NP_501211.1
Hydra_vulgaris	XP_002167561.1
Amphimedon_queenslandica	XP_003384452.1
Sphaeroforma_arctica	XP_014160556.1
Monosiga_brevicollis	XP_001750517.1
Capsaspora_owczarzaki	XP_004342960.1
Saccharomyces_cerevisiae_Porin1	NP_014343.1
Saccharomyces_cerevisiae_Porin2	NP_012152.3
Schizosaccharomyces_pombe	NP_001342966.1
Neurospora_crassa	XP_960950.1
Aspergillus_nidulans	XP_662006.1
Allomyces_macrogynus	KNE60596.1
Batrachochytrium_dendrobatidis	XP_006678557.1
Spizellomyces_punctatus	XP_016604457.1
Rhizopus_delemar	EIE89168.1
Thecamonas_trahens	XP_013757719.1
Chondrus_crispus	XP_005718903.1
Chara_braunii	GBG78672.1
Klebsormidium_nitens	GAQ81844.1
Cyanophora_paradoxa_CpTPOR	BBC44067.1
Helicosporidium	KDD74990.1
Chlamydomonas_eustigma	GAX78905.1
Arabidopsis_thaliana_1	NP_186777.1
Arabidopsis_thaliana_2	NP_201551.1
Arabidopsis_thaliana_3	NP_001190314.1
Arabidopsis_thaliana_4	NP_200557.1
Arabidopsis_thaliana_5	NP_190561.1
Trypanosoma_brucei	XP_011771688.1
Leishmania_major	XP_003721650.1
Trichomonas_vaginalis	XP_001320195.1
Dictyostelium_discoideum	XP_645436.1
Acanthamoeba_castellani	XP_004336285.1
